# Supplementary material for: Detection of ALDH3B2 in Human Placenta
Source: PubMed Central journal article supplement (PMC6941052; doi:10.3390/ijms20246292), 2019-12-13
Supplement: ijms-20-06292-s001.pdf [file ijms-20-06292-s001.pdf]

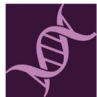

Article

# The detection of ALDH3B2 in human placenta

Sylwia Michorowska<sup>1,\*</sup>, Joanna Giebułtowicz<sup>1</sup>, Renata Wolinowska<sup>2</sup>, Anna Konopka<sup>3</sup>, Anna Wilkaniec<sup>4</sup>, Paweł Krajewski<sup>5</sup>, Ewa Bulska<sup>3</sup> and Piotr Wroczyński<sup>1</sup>

<sup>1</sup> Department of Bioanalysis and Drug Analysis, Faculty of Pharmacy, Medical University of Warsaw; e-ssolobodowska@wum.edu.pl, joanna.giebultowicz@wum.edu.pl, piotr.wroczyński@wum.edu.pl

<sup>2</sup> Department of Pharmaceutical Microbiology, Centre for Preclinical Research and Technology (CePT), Faculty of Pharmacy, Medical University of Warsaw; renata.wolinowska@wum.edu.pl

<sup>3</sup> Biological and Chemical Research Centre, Faculty of Chemistry, University of Warsaw; a.konopka@cnbc.uw.edu.pl, ebulska@chem.uw.edu.pl

<sup>4</sup> Department of Cellular Signaling, Mossakowski Research Centre, Polish Academy of Sciences; awilkaniec@imdik.pan.pl

<sup>5</sup> Forensic Medicine Department, First Faculty of Medicine, Medical University of Warsaw; pawel.krajewski@wum.edu.pl

\* Correspondence: ssolobodowska@wum.edu.pl;

Received: 7 November 2019; Accepted: 11 December 2019; Published: 13 December 2019

## Supplementary Materials:

Unedited images of the western blot analyses of placenta homogenates are shown in Figure S1.

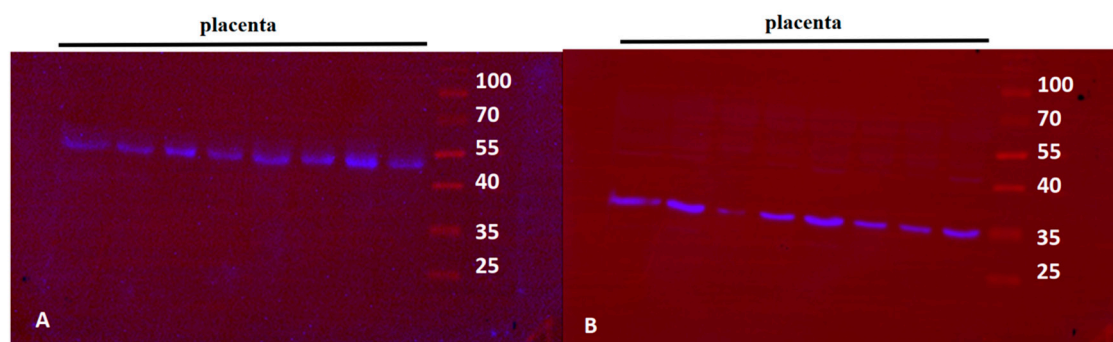

**Figure S1.** Western blot analysis of placenta homogenates using anti-ALDH3B2 (A) and anti-GAPDH (B) antibodies revealed bands corresponding to the molecular weight of 53 kDa (long isoform of ALDH3B2) and bands corresponding to molecular weight of 37 kDa (GAPDH). Proteins in homogenates were applied onto the polyacrylamide gel. After separation, they were transferred onto the PVDF membrane. Immunodetection of ALDH3B2 protein was performed using anti-ALDH3B2 antibody (A). After membrane stripping the immunodetection was repeated with anti-GAPDH antibody (B). GAPDH detection was used as a loading control, as GAPDH gene is constitutively expressed at high levels in many tissues. The image was taken using ChemiDoc XRS+ (Bio-Rad). As size standard PageRuler™ Prestained Protein Ladder (cat. No 26616) was used.

The images of western blot analyses of recombinant ALDH1A1, ALDH3A1 and short ALDH3B2 proteins as well as colons and ovaries homogenates are shown in Figure S2.

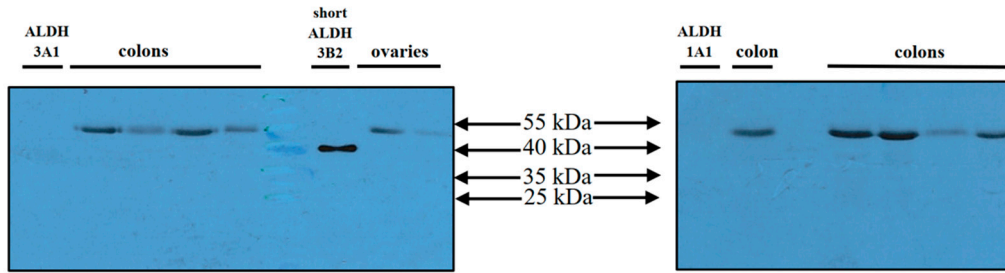

**Figure S2.** Western blot analyses using anti-ALDH3B2 antibody revealed bands corresponding to the molecular weight of 53 kDa (long isoform of ALDH3B2) in colons and ovaries homogenates and a band corresponding to molecular weight of 43 kDa in the case of purified short recombinant ALDH3B2. No bands were obtained in the case of purified recombinant ALDH1A1 and ALDH3A1 proteins. Homogenates and recombinant proteins were applied onto the polyacrylamide gel. After separation, proteins were transferred onto the PVDF membrane. Immunodetection was performed using anti-ALDH3B2 antibody. The chemiluminescence was detected using BioMax MR Film, Kodak.

The mass spectrum for sequencing of peptide AAQLQGLGHFLQENK found among tryptic fragments of long recombinant ALDH3B2 protein as well as sequence coverage of the recombinant long ALDH3B2 protein are shown in Figure S3.

### A Protein sequence coverage: 74%

Matched peptides shown in **bold red**.

```

1  MDPFEDTLRR LREAFNAGRT RPAEFF AAQL QGLGHFLQEN KQLLRDVLAQ
51 DLHKPAFEAD ISELILCQNE VDYALKNLQA WMKDEPRSTN LFMKLDSVFI
101 WKEPFGVLVI IAPWNYPLNL TLVLLVGALA AGSCVVLKPS EISQGTEKVL
151 AEVLPQYLDQ SCFAVVLGGP QETGQLLEHK LDYIFFTGSP RVGKIVMTAA
201 TKHLTPVTLE LGGKNPCYVD DNCDPQTVAN RVAWFYFNA GQTCVAPDYV
251 LCSPQMQRERL LPALQSTITR FYGDDPQSSP NLGHIINQKQ FQRLRALLC
301 SRVAIGGQSN ESDRYIAPT LVDVQETEPV MQEEIFGPIL PIVNVQSVDE
351 AIKFINRQEK PLALYAFNS SQVVNQMLER TSSGSFSGNE GFTYISLLSV
401 PFGGVGHSGM GRYHGKFTFD TFSHHRTCLL APSGLEKLKE IHYPPYTDWN
451 QQLLRWGMGS QSCTLL
    
```

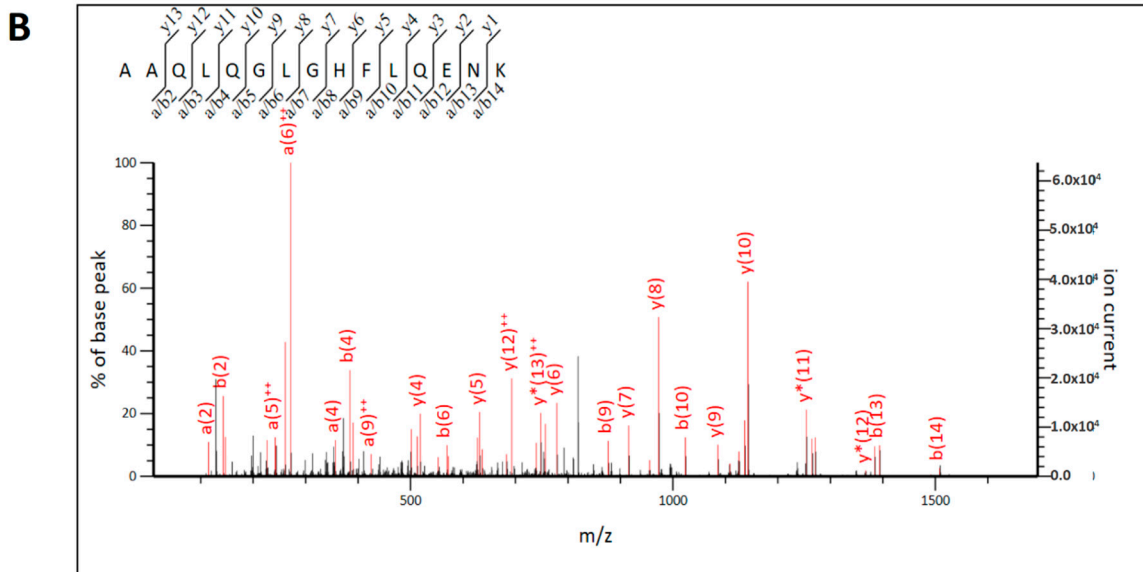

Figure S3. A. Sequence coverage of the recombinant long ALDH3B2 (from Mascot report). Peptides found experimentally are marked with red color, amino acid sequence encoded by nucleotides located upstream the second start codon is underlined, amino acid sequence of unique peptide identified also in analysis of placenta homogenate is framed with a black box. B. MS/MS spectrum registered for AAQLQGLGHFLQENK peptide. The upper left corner indicates the source of the fragment ions identified as either a, b or y ions. ++ designates doubly charged fragment ions, \* designates fragment ions with neutral loss.

The probability curve for the formation of transmembrane helices by long ALDH3B2 isoform obtained using TMHMM Server v. 2.0 [1,2] is shown in Figure S4.

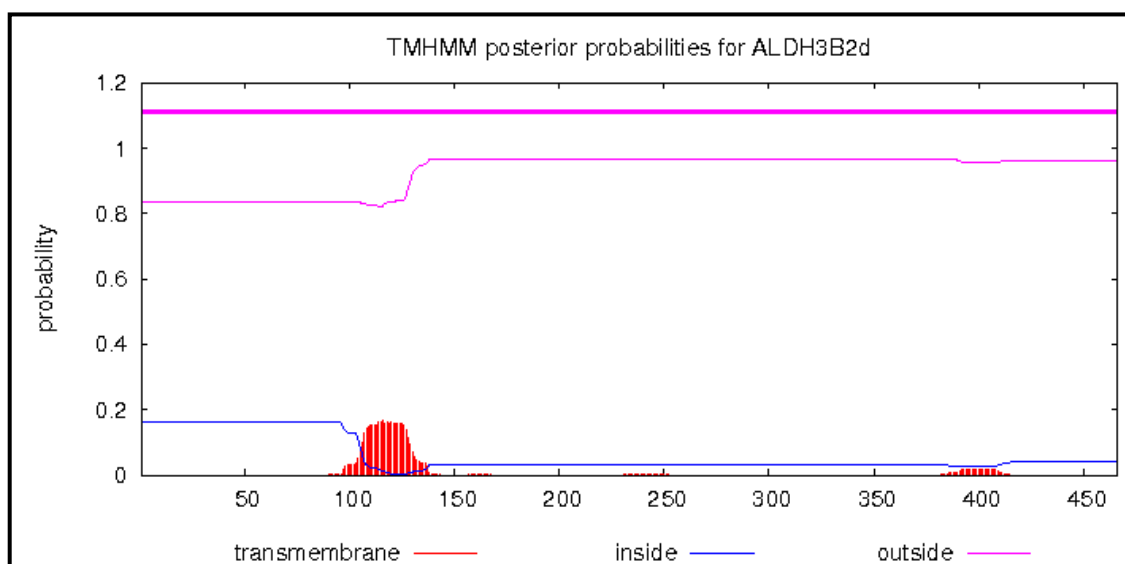

**Figure S4. Prediction of transmembrane helix formation by long ALDH3B2 isoform.** The probability curve for the occurrence of transmembrane helix in case of long ALDH3B2 isoform was obtained using TMHMM Server v. 2.0 [1,2] and the ALDH3B2 sequence, the product of translation of mRNA transcript number U37519.1 from NCBI obtained using ExPASy server [3] with alanine in the position encoded by premature stop codon.

The alignment of all *ALDH3B2* mRNA sequences available in NCBI is shown in Figure S5.

|                                           |                                                                                  |     |
|-------------------------------------------|----------------------------------------------------------------------------------|-----|
| mRNA1                                     | GTAGGAGCAGAGCCTGCGCATCTGGAGGCAGCATGTCCAAGAAAGGGAGTGGAGGTGCAG                     | 341 |
| mRNA2                                     | GTAGGAGCAGAGCCTGCGCATCTGGAGGCAGCATGTCCAAGAAAGGGAGTGGAGGTGCAG                     | 131 |
| mRNA3                                     | -----CTGCCACCATGTGAA-G-AAGGATGTGGT--TGCTT                                        | 32  |
| mRNA4                                     | GTAGGAGCAGAGCCTGCGCATCTGGAGGCAGCATGTCCAAGAAAGGGAGTGGAGGTGCAG                     | 165 |
| mRNA5                                     | GTAGGAGCAGAGCCTGCGCATCTGGAGGCAGCATGTCCAAGAAAGGGAGTGGAGGTGCAG                     | 288 |
| <b>FIRST START CODON</b>                  |                                                                                  |     |
| mRNA1                                     | CGAAGGACCCAGGGGCGAGAGCCAC-GCTGGGG <b>ATGG</b> ACCCCTTCGAGGACACACTGCGG            | 400 |
| mRNA2                                     | CGAAGGACCCAGGGGCGAGAGCCAC-GCTGGGG <b>ATGG</b> ACCCCTTCGAGGACACACTGCGG            | 190 |
| mRNA3                                     | CCC-----CTTCCACCATAACT <b>GATGG</b> ACCCCTTCGAGGACACGCTGCGG                      | 77  |
| mRNA4                                     | CGAAGGACCCAGGGGCGAGAGCCAC-GCTG- <b>GGATGG</b> ACCCCTTCGAGGACACGCTGCGG            | 223 |
| mRNA5                                     | CGAAGGACCCAGGGGCGAGAGCCAC-GCTGGGG <b>ATGG</b> ACCCCTTCGAGGACACGCTGCGG            | 347 |
| <b>TAKE-OFF SITE PREMATURE STOP CODON</b> |                                                                                  |     |
| mRNA1                                     | CGGCTGCGTGAGGCCCTT <b>CAACTGA</b> GGGGCGCACGCGGCCGGCCGAGTTCGGG <b>GCTGCGCAG</b>  | 46  |
| mRNA2                                     | CGGCTGCGTGAGGCCCTT <b>CAACTGA</b> GGGGCGCACGCGGCCGGCCGAGTTCGGG <b>GCTGCGCAG</b>  | 250 |
| mRNA3                                     | CGGCTGCGTGAGGCCCTT <b>CAACTGA</b> GGGGCGCACGCGGCCGGCCGAGTTCGGG <b>GCTGCGCAG</b>  | 137 |
| mRNA4                                     | CGGCTGCGTGAGGCCCTT <b>CAACTGA</b> GGGGCGCACGCGGCCGGCCGAGTTCGGG <b>GCTGCGCAG</b>  | 283 |
| mRNA5                                     | CGGCTGCGTGAGGCCCTT <b>CAACTGA</b> GGGGCGCACGCGGCCGGCCGAGTTCGGG <b>GCTGCGCAG</b>  | 407 |
| <b>LANDING SITE</b>                       |                                                                                  |     |
|                                           | <b>L Q G L G H F L Q E E N K</b>                                                 |     |
| mRNA1                                     | CTCCAGGGCCTGGGCCACTT <b>CTC</b> TTC <b>CAAGAAACA</b> AAGCAGCTTCTGCGCGACGTGCTGGCC | 520 |
| mRNA2                                     | CTCCAGGGCCTGGGCCACTT <b>CTC</b> TTC <b>CAAGAAACA</b> AAGCAGCTTCTGCGCGACGTGCTGGCC | 310 |
| mRNA3                                     | CTCCAGGGCCTGGGCCACTT <b>CTC</b> TTC <b>CAAGAAACA</b> AAGCAGCTTCTGCGCGACGTGCTGGCC | 197 |
| mRNA4                                     | CTCCAGGGCCTGGGCCACTT <b>CTC</b> TTC <b>CAAGAAACA</b> AAGCAGCTTCTGCGCGACGTGCTGGCC | 343 |
| mRNA5                                     | CTCCAGGGCCTGGGCCACTT <b>CTC</b> TTC <b>CAAGAAACA</b> AAGCAGCTTCTGCGCGACGTGCTGGCC | 467 |
| <b>LANDING SITE</b>                       |                                                                                  |     |
| mRNA1                                     | CAGGACCTGCATAAGCCAGCTTTCGAGGCAGACATATCTGAGCTCATCCTTTGCCAG <b>AAAC</b>            | 580 |
| mRNA2                                     | CAGGACCTGCATAAGCCAGCTTTCGAGGCAGACATATCTGAGCTCATCCTTTGCCAG <b>AAAC</b>            | 370 |
| mRNA3                                     | CAGGACCTGCATAAGCCAGCTTTCGAGGCAGACATATCTGAGCTCATCCTTTGCCAG <b>AAAC</b>            | 257 |
| mRNA4                                     | CAGGACCTGCATAAGCCAGCTTTCGAGGCAGACATATCTGAGCTCATCCTTTGCCAG <b>AAAC</b>            | 403 |
| mRNA5                                     | CAGGACCTGCATAAGCCAGCTTTCGAGGCAGACATATCTGAGCTCATCCTTTGCCAG <b>AAAC</b>            | 527 |
| <b>LANDING SITE SECOND START CODON</b>    |                                                                                  |     |
| mRNA1                                     | GAGGTTGACTACGCTCTCAAG <b>AAAC</b> CTTCAGGCCTGG <b>ATGA</b> AGGATGAACCACGGTCCACG  | 640 |
| mRNA2                                     | GAGGTTGACTACGCTCTCAAG <b>AAAC</b> CTTCAGGCCTGG <b>ATGA</b> AGGATGAACCACGGTCCACG  | 430 |
| mRNA3                                     | GAGGTTGACTACGCTCTCAAG <b>AAAC</b> CTTCAGGCCTGG <b>ATGA</b> AGGATGAACCACGGTCCACG  | 317 |
| mRNA4                                     | GAGGTTGACTACGCTCTCAAG <b>AAAC</b> CTTCAGGCCTGG <b>ATGA</b> AGGATGAACCACGGTCCACG  | 463 |
| mRNA5                                     | GAGGTTGACTACGCTCTCAAG <b>AAAC</b> CTTCAGGCCTGG <b>ATGA</b> AGGATGAACCACGGTCCACG  | 587 |

**Figure S5. Alignment of different ALDH3B2 mRNA sequences available in NCBI.** The following ALDH3B2 mRNA sequences were aligned using Clustal Omega server [4]: mRNA1 (NCBI: U37519.1), mRNA2 (NCBI: NM\_000695.3), mRNA3 (NCBI: NM\_001354345.1), mRNA4 (NCBI: NM\_000695.2) and mRNA5 (NCBI: NM\_001031615.2). Green indicates start codons, red indicates stop codon, yellow indicates potential matching take-off and landing sites of ribosome during bypassing event and violet indicates the nucleotides encoding the peptide identified in MS/MS analysis. Its sequence is annotated above the corresponding nucleotides.

Supplementary materials can be found at [www.mdpi.com/xxx/s1](http://www.mdpi.com/xxx/s1).

1. Krogh, A.; Larsson, B.; von Heijne, G.; Sonnhammer, E.L.. Predicting transmembrane protein topology with a hidden markov model: application to complete genomes<sup>11</sup>Edited by F. Cohen. *J. Mol. Biol.* **2001**, *305*, 567–580.
2. Sonnhammer, E.L.; von Heijne, G.; Krogh, A. A hidden Markov model for predicting transmembrane helices in protein sequences. *Proceedings. Int. Conf. Intell. Syst. Mol. Biol.* **1998**, *6*, 175–82.
3. Gasteiger, E.; Gattiker, A.; Hoogland, C.; Ivanyi, I.; Appel, R.D.; Bairoch, A. ExPASy: The proteomics server for in-depth protein knowledge and analysis. *Nucleic Acids Res.* **2003**, *31*, 3784–8.

4. Sievers, F.; Wilm, A.; Dineen, D.; Gibson, T.J.; Karplus, K.; Li, W.; Lopez, R.; McWilliam, H.; Remmert, M.; Soding, J.; et al. Fast, scalable generation of high-quality protein multiple sequence alignments using Clustal Omega. *Mol. Syst. Biol.* **2011**, *7*, 539–539.

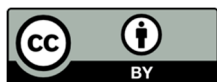

© 2019 by the authors. Submitted for possible open access publication under the terms and conditions of the Creative Commons Attribution (CC BY) license (<http://creativecommons.org/licenses/by/4.0/>).
